# Supplementary material for: Transcriptomic Changes and satP Gene Function Analysis in Pasteurella multocida with Different Levels of Resistance to Enrofloxacin
Source: MDPI journal article supplement (doi:10.3390/vetsci10040257), 2023-03-28
Supplement: s1 [file s1]

Supplementary Tables for

**Transcriptomic Changes and *satP* Gene Function Analysis in**

***Pasteurella multocida* with Different Levels of Resistance to**

**Enrofloxacin**

**Supplementary Table S1.** Primer sequence.

| Primer name | sequence (5'→3')                    |
|-------------|-------------------------------------|
|             | F: CGTCTAGAACCATGAGCGAGATCTTTGATATT |
| UP          | R: ATCAAAAGATGGTGCGAAAAAATAAGATAAC  |
| DOWN        | F: TTTTCGCACCATCTTTTGATGATGACAT     |
|             | R: TAGAGCTCTGTTTCATCAGCGCTGCGGTA    |

**Supplementary Table S2.** The quality analysis of total RNA in *Pm*.

| Sample<br>name | OD26<br>0/280 | OD26<br>0<br>/230 | Sample<br>name | OD26<br>0<br>/230 | OD26<br>0<br>/230 | Sample<br>name | OD26<br>0<br>/280 | OD260<br>/230 |
|----------------|---------------|-------------------|----------------|-------------------|-------------------|----------------|-------------------|---------------|
| PMS            | 2.19          | 2.30              | PMR            | 2.12              | 2.20              | PMHR           | 2.18              | 1.77          |
| PMS            | 2.17          | 2.32              | PMR            | 2.16              | 2.16              | PMHR           | 2.18              | 2.04          |
| PMS            | 2.17          | 2.31              | PMR            | 2.19              | 2.19              | PMHR           | 2.20              | 1.98          |

**Supplementary Table S3.** Statistical results of trimmed reads mapping with reference genome.

| Sample  | Before Filter     |            |            |           | After Filter         |            |            |           |
|---------|-------------------|------------|------------|-----------|----------------------|------------|------------|-----------|
|         | Clean<br>Data(bp) | Q20<br>(%) | Q30<br>(%) | GC<br>(%) | HQ Clean<br>Data(bp) | Q20<br>(%) | Q30<br>(%) | GC<br>(%) |
| PMS-1   | 2321207700        | 97.56      | 93.45      | 43.30     | 2159560579           | 98.44      | 94.65      | 42.69     |
| PMS-2   | 1897499100        | 97.54      | 93.38      | 43.49     | 1768955797           | 98.39      | 94.52      | 42.87     |
| PMS-3   | 1910560200        | 97.72      | 93.67      | 43.31     | 1789862837           | 98.46      | 94.68      | 42.76     |
| PMR-1   | 2298293700        | 98.06      | 94.81      | 43.92     | 2126675340           | 98.92      | 96.01      | 43.32     |
| PMR-2   | 2337310800        | 97.95      | 94.68      | 43.64     | 2161900037           | 98.90      | 95.97      | 43.04     |
| PMR-3   | 2141400600        | 97.97      | 94.54      | 43.79     | 1985325044           | 98.82      | 95.71      | 43.15     |
| PMHR-1  | 2411388900        | 98.09      | 94.70      | 43.17     | 2247057575           | 98.81      | 95.72      | 42.48     |
| PMHR-2  | 2161450500        | 97.89      | 94.29      | 43.21     | 2013130234           | 98.67      | 95.37      | 42.54     |
| PM-HR-3 | 1878329400        | 97.97      | 94.48      | 43.07     | 1750311733           | 98.74      | 95.54      | 42.40     |

**Supplementary Table S4.** The Statistics of functional annotation.

|         | GO  | KEGG |
|---------|-----|------|
| S-vs-R  | 187 | 73   |
| R-vs-HR | 189 | 76   |
| S-vs-HR | 248 | 66   |

**Supplementary Table S5.** The results of top GO.

| GO ID          | FUNCTION                               | GO ID          | FUNCTION                    | GO ID          | FUNCTION                         |
|----------------|----------------------------------------|----------------|-----------------------------|----------------|----------------------------------|
| N              |                                        |                |                             |                |                                  |
| GO:004442<br>5 | Membrane                               | GO:004322<br>9 | Intracellular<br>organelles | GO:003125<br>2 | Cellular front                   |
| GO:003122<br>4 | Inherent<br>composition<br>of membrane | GO:003017<br>6 | Intracellular<br>organelles | GO:000830<br>5 | Complex<br>integrin              |
| GO:009868<br>7 | Chromosome<br>region                   | GO:004442<br>4 | Intracellular<br>r          | GO:003130<br>1 | Membrane<br>component            |
| GO:003109<br>0 | Organelle<br>membrane                  | GO:004322<br>8 | Unbounded<br>organelle      | GO:009863<br>6 | Adhesion<br>protein              |
| GO:009745<br>8 | Neuronal<br>part                       | GO:004323<br>2 | Intracellular<br>organelles | GO:001645<br>9 | Myosin                           |
| GO:009885<br>8 | Cell<br>projection                     | GO:004329<br>2 | Shrinkage<br>fibre          | GO:003017<br>5 | Dendrite                         |
| GO:004442<br>7 | Chromosome<br>part                     | GO:004299<br>5 | Cell<br>projection          | GO:004322<br>7 | Intra-<br>boundary<br>organelles |
| GO:004429<br>7 | Cell body                              | GO:000562<br>2 | Intracellular<br>r          | GO:004445<br>0 | Microtubule<br>tissue            |
| GO:003198<br>4 | Organelle<br>region                    | GO:001602<br>1 | Membrane<br>component       | GO:000078<br>1 | Chromosome<br>telomeres          |
| GO:003042<br>4 | Axon                                   | GO:004300<br>5 | Neuronal<br>projection      | GO:009879<br>6 | Membrane<br>protein              |
| GO:003326<br>7 | Axonal part                            | GO:004322<br>6 | Organelle                   | GO:003122<br>7 | Endoplasmic<br>reticulum<br>part |

**Supplementary Table S6.** LD<sub>50</sub> test results of *PmS* and  $\Delta PmS$ .

|              | Number of<br>Bacteria animals /n | Dosage<br>administered /<br>(CFU/mL) | Dose<br>logarithm<br>/x | Number of<br>dead animals<br>/r | Mortality<br>rate/p | Survival<br>rate/q | pq   |
|--------------|----------------------------------|--------------------------------------|-------------------------|---------------------------------|---------------------|--------------------|------|
| <i>PmS</i>   | 10                               | 10 <sup>5</sup>                      | 5                       | 0                               | 0                   | 1                  | 0    |
| <i>PmS</i>   | 10                               | 3×10 <sup>5</sup>                    | 5.5                     | 0                               | 0                   | 1                  | 0    |
| <i>PmS</i>   | 10                               | 10 <sup>6</sup>                      | 6                       | 4                               | 0.4                 | 0.6                | 0.24 |
| <i>PmS</i>   | 10                               | 3×10 <sup>6</sup>                    | 6.5                     | 6                               | 0.6                 | 0.4                | 0.24 |
| <i>PmS</i>   | 10                               | 10 <sup>7</sup>                      | 7                       | 10                              | 1                   | 0                  | 0    |
| $\Delta PmS$ | 10                               | 10 <sup>9</sup>                      | 9                       | 0                               | 0                   | 1                  | 0    |
| $\Delta PmS$ | 10                               | 3×10 <sup>9</sup>                    | 9.5                     | 0                               | 0                   | 1                  | 0    |
| $\Delta PmS$ | 10                               | 10 <sup>10</sup>                     | 10                      | 8                               | 0.8                 | 0.2                | 0.16 |
| $\Delta PmS$ | 10                               | 3×10 <sup>10</sup>                   | 10.5                    | 10                              | 1                   | 0                  | 0    |
| $\Delta PmS$ | 10                               | 10 <sup>11</sup>                     | 11                      | 10                              | 1                   | 0                  | 0    |
