# Supplementary material for: Transcriptomic Changes and satP Gene Function Analysis in Pasteurella multocida with Different Levels of Resistance to Enrofloxacin
Source: MDPI journal article supplement (doi:10.3390/vetsci10040257), 2023-03-28
Supplement: s1 [file s1]

Supplementary Figures for

**Transcriptomic Changes and *satP* Gene Function Analysis in**

***Pasteurella multocida* with Different Levels of Resistance to**

**Enrofloxacin**

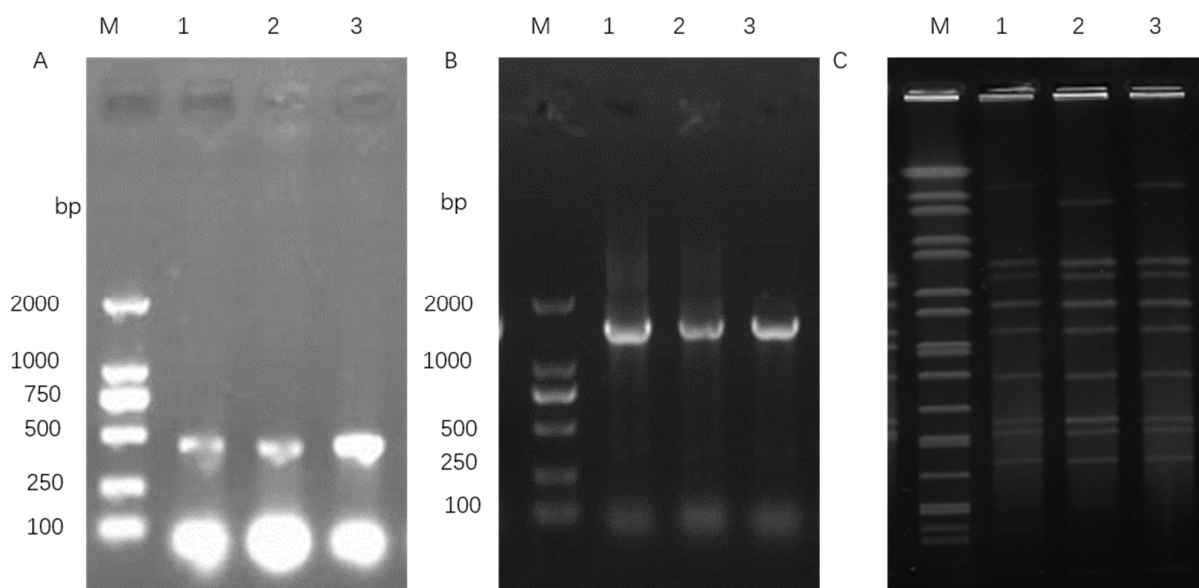

**Supplementary Figure S1.** Identification of *Pm* A: The PCR results of KMT1; B: The PCR results of 16S rDNA; C: The results of PFGE typing.

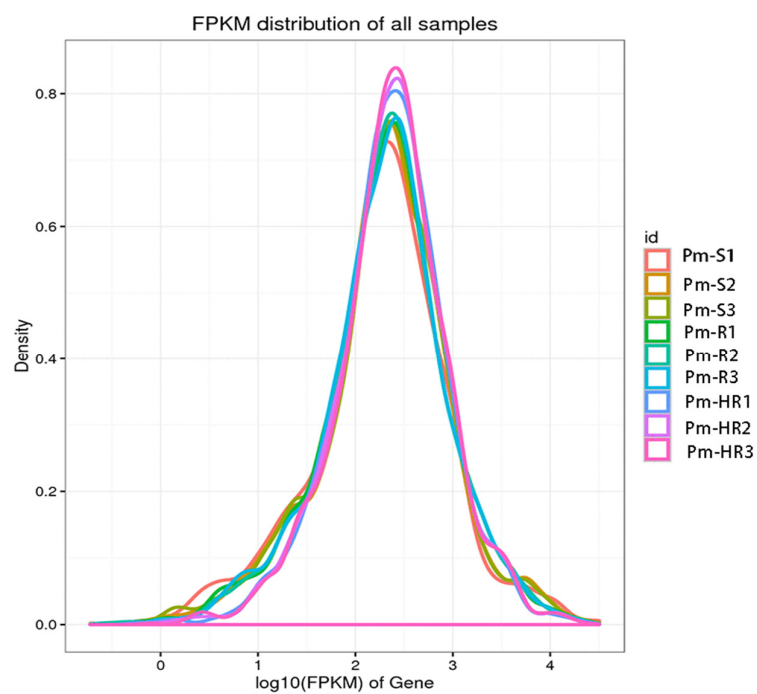

**Supplementary Figure S2.** The density of FPKM. The horizontal:  $\log_{10}$  of FPKM; The ordinate: The density of FPKM.

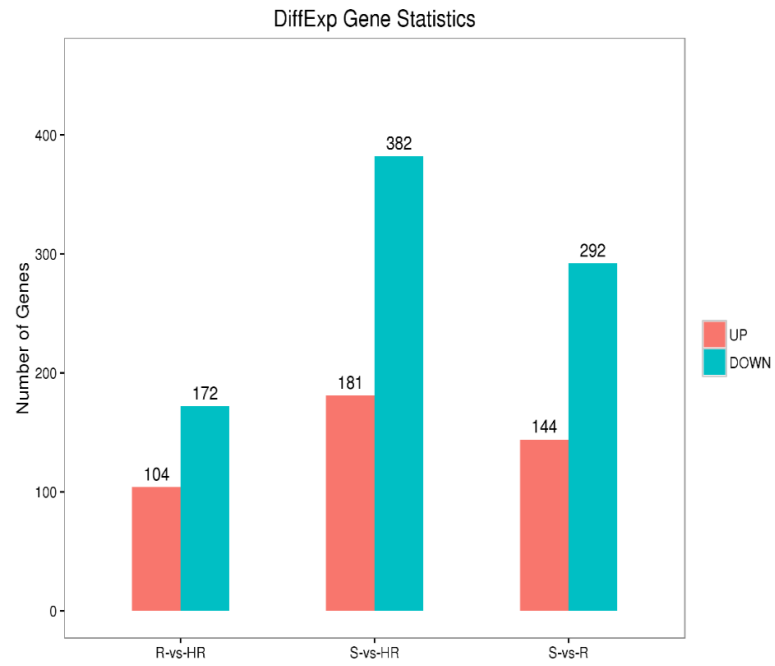

**Supplementary Figure S3.** Histogram of differential gene between groups. The horizontal: sample groups; The ordinate: The number of differential gene.

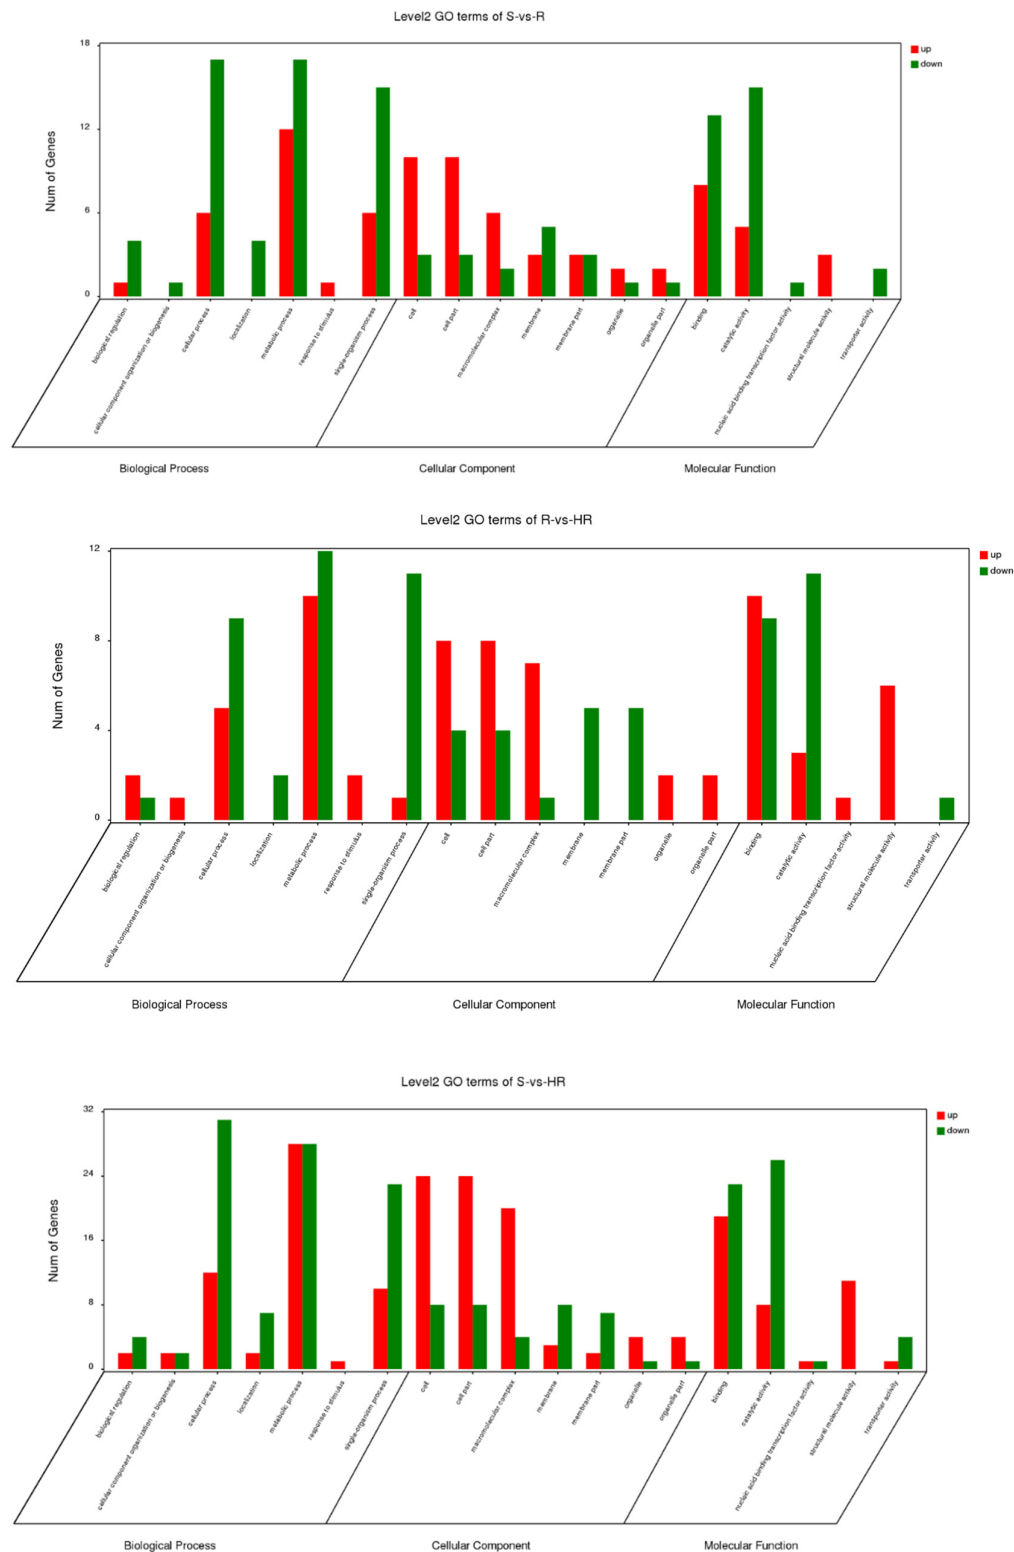

**Supplementary Figure S4.** DEGs of biological process, cellular component and molecular function GO terms. A: *PmS*-vs-*PmR*; B: *PmR*-vs-*PmHR*; C: *PmS*-vs-*PmHR*.

A

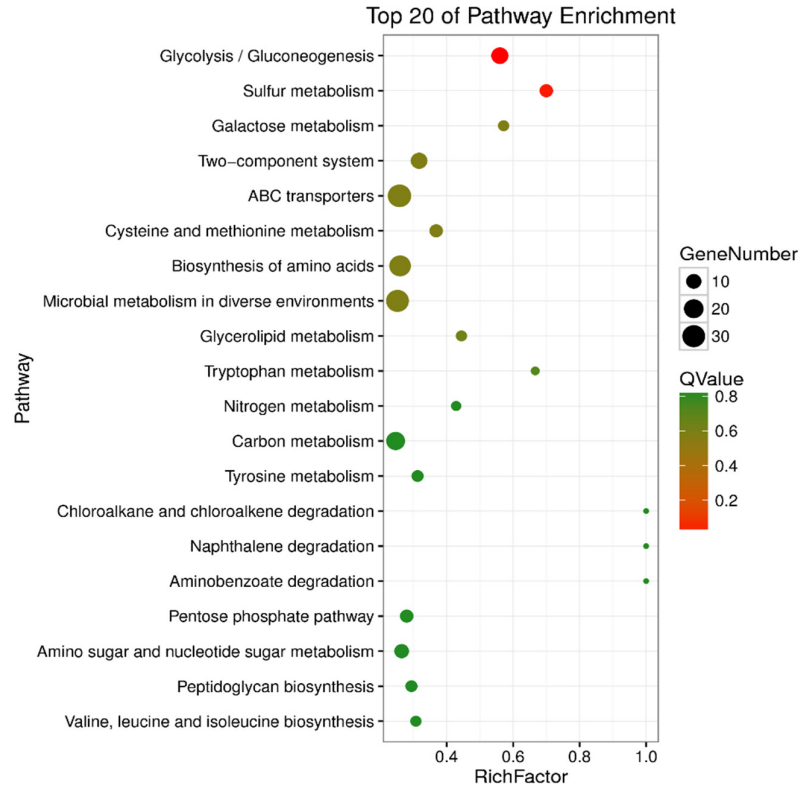

B

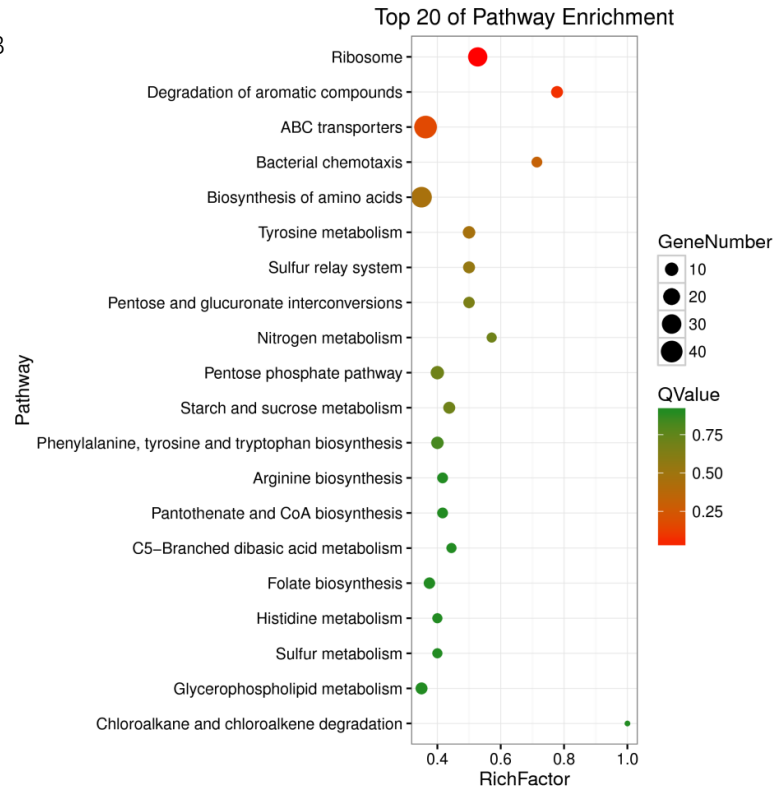

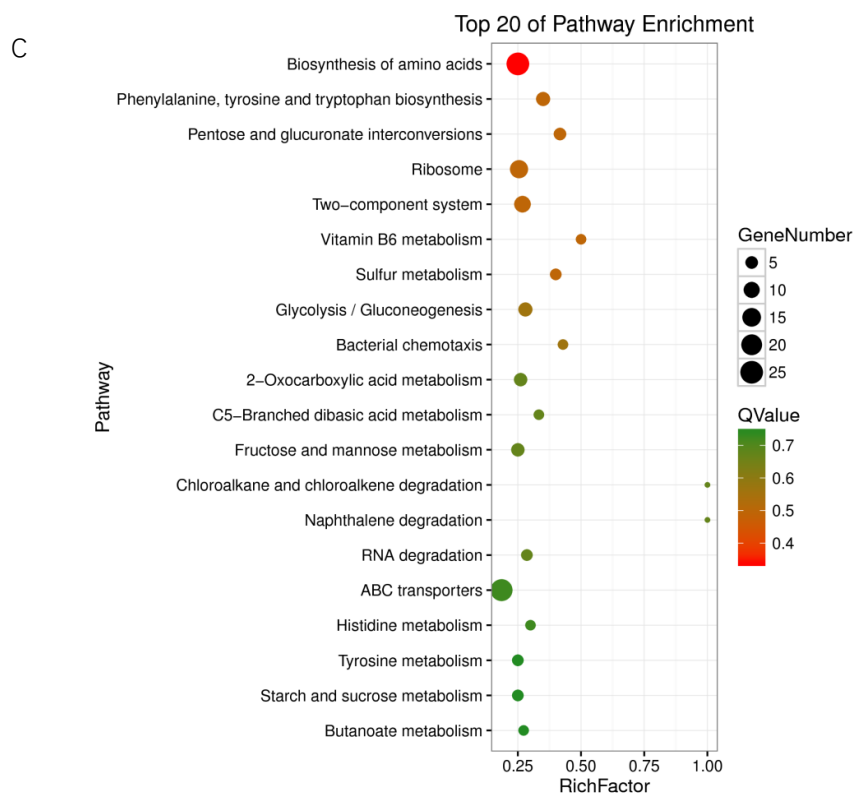

**Supplementary Figure S5.** The enrichment bubble map of KEGG A: *PmS*-vs-*PmR*; B: *PmR*-vs-*PmHR*; C: *PmS*-vs-*PmHR*.
